# Supplementary material
Source: Springer Nature journal article supplement (http://www.springermedizin.de/resource/supplementary/13014_2013_1176_MOESM1_ESM.pdf/9635040)

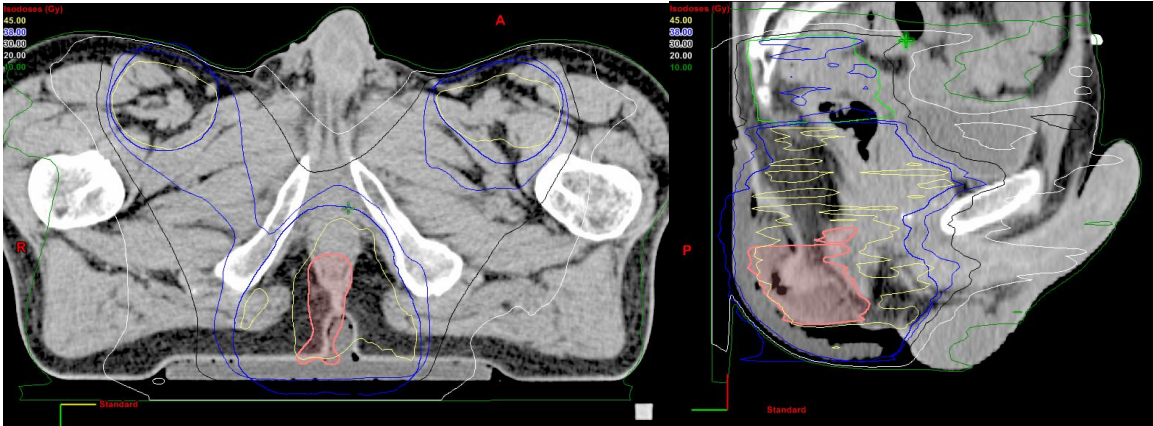

A

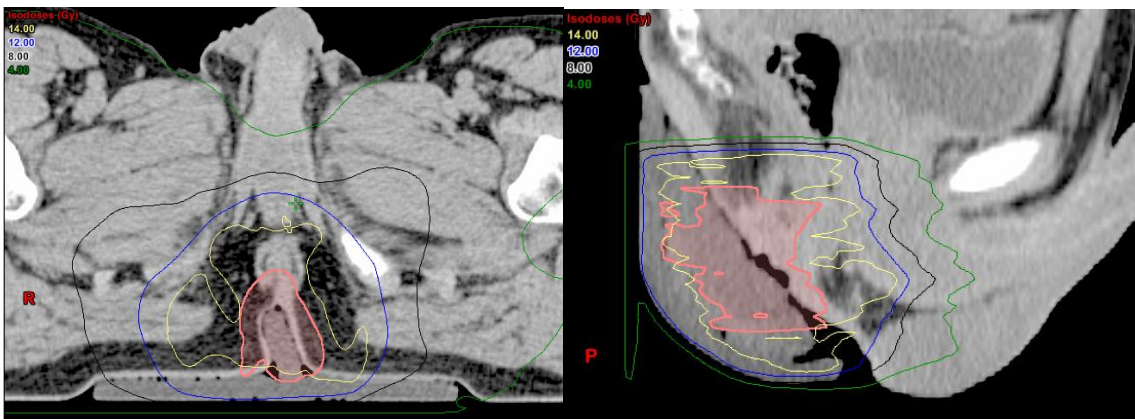

B

Supplement: MOESM1 [file 9635040]
